# Supplementary material for: Lymph node-biomimetic scaffold boosts CAR-T therapy against solid tumor
Source: PubMed Central journal article supplement (PMC10911814; doi:10.1093/nsr/nwae018), 2024-01-11
Supplement: nwae018_supplemental_file.pdf [file nwae018_supplemental_file.pdf]

1  
2  
3  
4  
5  
6  
7

Supplementary text

Fig. S1 to S13

## 1 **Materials**

2 Poly(D, L-lactide-co-glycolide) (PLGA, lactic: glycolic 75 : 25, Mw = 76,000-115,000, Aladdin),  
3 Poly(vinyl alcohol) (PVA, Mw~47000, Aladdin), gelatin (gel strength  $\geq$ 250 g Bloom, Beyotime),  
4  $\epsilon$ -poly-L-lysine·HCl (Mw = 2000-5000, Aladdin), D-biotin N-succinimidyl ester (Aladdin),  
5 dichloromethane (DCM), dimethyl sulfoxide (DMSO), triethylamine sodium hydroxide (NaOH)  
6 Streptavidin, anti-human CD3 antibodies (Biolegend) and anti-human CD28 antibodies  
7 (Biolegend), recombinant human IL-7 (Peprotech) and recombinant human IL-15 (Peprotech).

## 8 **Emulsion Preparation**

9 Gelatin was dissolved in deionized water and PLGA was dissolved in DCM with a final  
10 concentration of 7.5% and 2% (wt%), respectively. To prepare the emulsion, mix the gelatin  
11 solution (1 g) and PLGA solution (2.26 g) with the homogenizer (15000 rpm/min) for 3 minutes.

## 12 **Synthesis of biotin-modified poly- L -lysine (PLL-Biotin)**

13 D-biotin N-succinimidyl ester (0.05 g),  $\epsilon$ -poly- L -lysine·HCl (0.10 g), and triethylamine (0.13 mL)  
14 were dissolved in DMSO (4 mL). 24 hours later, anhydrous ether was added to the reaction solution  
15 by drops to form the precipitate. The supernatant was discarded by centrifugation. The product  
16 was purified by dialysis in deionized water. The biotin-modified PLL (PLL-Biotin) was collected  
17 by freeze-drying. The structure of the product was determined by  $^1\text{H-NMR}$ .

## 18 **Antibody-modification of porous microspheres**

19 The porous microspheres were immersed in NaOH solution (0.04 M) for 30 minutes and then  
20 washed with deionized water five times. PLL-Biotin was dissolved in deionized water (5 mL) and  
21 reacted with microspheres at 4 °C overnight. Then, the streptavidin (50  $\mu\text{g}$ ) was added to the  
22 washed microspheres and mixed on a thermo shaker at 4 °C for 6 hours. 10  $\mu\text{g}$  each of anti-human  
23 CD3 antibodies (Biolegend) and anti-human CD28 antibodies (Biolegend) were added and mixed  
24 on a thermo shaker at 4 °C overnight after rinsing the microspheres with 5 mL PBS.

25 To quantitatively calculate the grafting efficiency, biotin-modified IgG (Elabscience Biotechnology)  
26 were utilized as a mock of the anti-human CD3 and anti-human CD28 antibodies. After incubation,  
27 the antibody solutions were collected and added to a streptavidin coated plate (Ruixin Biotech).  
28 After one hour of incubation at room temperature, the plate was washed with 0.05% of tween-20.  
29 Then, HRP-conjugated affipure IgG antibodies (Proteintech) were added and incubated. After

1 wash, the TMB substrate and stop solution were added subsequently. The wells were then read at  
2 450 nm.

### 3 **Characterization of microspheres**

4 The microspheres were fixed to the scanning electron microscopy (SEM) sample stage by  
5 conductive tape and then they were sprayed with gold for one minute. The morphology of  
6 microspheres was observed by SEM (Thermo FEI, CZ) and their particle size and pore size were  
7 calculated by ImageJ. The modification of microspheres was observed by laser scanning confocal  
8 microscope (LSCM, Zeiss, Germany). The mechanical strength of microspheres was assayed by  
9 tensile strength tester. A single microsphere was placed in the stainless-steel plate and the force  
10 was recorded after deformation.

### 11 **Cell line**

12 The human cervical cancer cell line HeLa was transduced to express firefly luciferase (FFLuc) and  
13 cultured in RPMI 1640 medium (Gibco) supplemented with 10% fetal bovine serum (Gibco) and  
14 1% penicillin-streptomycin (Gibco).

### 15 **CAR-T cell manufacturing**

16 Human peripheral blood mononuclear cells (PBMCs) were isolated from the peripheral blood of  
17 healthy volunteers using human lymphocyte separation medium (Dakewe). Ethical permission was  
18 granted by the School of Medicine, Zhejiang University. Informed consent was obtained from all  
19 donors. CliniMACS CD3 reagent (Miltenyi) was applied to separate CD3<sup>+</sup> T cells from human  
20 PBMC. Then the separated CD3<sup>+</sup> T cells were activated using TransAct T cell reagent (Miltenyi).  
21 By day 2, the activated T cells were infected with CAR-encoding retrovirus or Luciferase-CAR-  
22 encoding retrovirus produced from 293T. Infected T cells were expanded for another 8 days to  
23 meet the treatment requirements. The expression of CAR in T cell samples was tested by flow  
24 cytometry via APC anti-HA.11 epitope tag antibody (Biolegend) staining. CAR-T cells were  
25 cultured in X-VIVO<sup>TM</sup> 15 medium (Lonza) with cytokines, human recombinant interleukin-15 (IL-  
26 15, 10 ng/mL) and human recombinant interleukin-7 (IL-7, 5 ng/mL). Cells were incubated at  
27 37 °C in an incubator (Thermo Fisher Scientific) under an atmosphere of 5% CO<sub>2</sub> and 90% relative  
28 humidity.

### 29 **CAR-T cell encapsulation**

1 CAR-T cells were suspended in cell culture medium with concentration with 1, 2, 4, 6, 8 × 10<sup>7</sup>  
2 cells/mL. 100 porous microspheres were placed in the cell suspension for 40 mins. Then they were  
3 placed into a vacuum environment for 20 mins. The CAR-T cells suspension was discarded, and  
4 300 μL of PBS was added to release the CAR-T cells within the microspheres for 1 hour. Repeat  
5 this procedure for four times. All of CAR-T cells in PBS were collected and calculated by flow  
6 cytometry with precision count beads (Biolegend). To observe the CAR-T cells loaded within the  
7 microspheres, CAR-T cells were incubated with carboxyfluorescein diacetate succinimidyl ester  
8 (CellTrace™ CFSE, ThermoFisher) for 15 mins. After 2 days of culture, the CAR-T cells loaded  
9 microspheres were freeze-dried to be characterized by the SEM or cut into 10 μm sections. The  
10 distribution of CAR-T cells was visualized *via* LSCM.

#### 11 ***In vitro* cell assay**

12 The cytokines secreted by CAR-T cells in the supernatant were monitored by the enzyme-linked  
13 immunosorbent assay (ELISA) kit (Multisciences). To analyze the subtypes of CAR-T cells, the  
14 amplified T cells were collected and stained with anti-CD3, anti-CD4, anti-CD8, anti-LAG-3, and  
15 anti-PD-1 fluorescent antibodies (All purchased from Biolegend) for flow cytometry analysis.

#### 16 ***In vitro* cytotoxicity assay**

17 1 × 10<sup>4</sup> luciferase-encoding HeLa tumor cells per well were seeded to 96-well black cell culture  
18 plates and cultured overnight. Then, the same number of expanded CAR-T cells were added to the  
19 well plates and co-cultured with tumor cells. Tumor cells alone were determined as the control.  
20 After 24 hour of incubation, the cell culture supernatant was discarded and 100 μL D-Luciferin  
21 potassium salt solution (150 μg/mL) was added. The bioluminescence of retained tumor cells were  
22 analyzed immediately by microplate reader (Thermo Fisher).

#### 23 **Scaffold *in vivo* degradation study**

24 1% Cy5-PLGA (Chongqing Yusi) were mixed into PLGA powder while fabricating microspheres.  
25 Then, 100 Cy5 marked microspheres were subcutaneously injected into NSG mice. *In Vivo*  
26 Imaging Systems were used to detect the fluorescent signals.

#### 27 **Fabrication of IL-7/15 loading microspheres**

28 Recombinant human IL-7 (Peprotech) and IL-15 (Peprotech) lyophilized powder were dissolved  
29 in sterile water respectively at a concentration of 220 μg/mL. 50 μL IL-7 and IL-15 solution were

1 added to 450  $\mu$ L DCM containing 2% PLGA. Then, the homogenizer was applied to mix the  
2 solution and generated the emulsion (8000 rpm/min, 1 min). The emulsion was added drop by drop  
3 to the 1% PVA solution under stirring. After 4 hours of stirring, the IL-7/15 loading microspheres  
4 were collected and characterized.

### 5 **Cytokines *in vivo* release study**

6 50 mg of IgG and 0.25 mg of Cy5 were mixed in bicarbonate buffer overnight. Then, the Cy5  
7 labeled IgG (Cy5-IgG) were harvested after dialysis and lyophilization. The microspheres were  
8 prepared *via* the mentioned method, wherein the cytokines were replaced with the same amount  
9 of Cy5-IgG and were injected into NSG mice subcutaneously. The fluorescence of the  
10 microspheres was detected via *In Vivo* Imaging Systems every two days.

### 11 **Mice and xenograft cancer model generation**

12 All the animals were housed in the laboratory animal center of Zhejiang University, and all the  
13 animal studies were conducted with the approval of their Institutional Animal Care and Use  
14 Committee. Six- to eight-week old female NOD.Cg-Prkdc<sup>scid</sup>Il2rg<sup>em1Smoc</sup> (NSG) mice were  
15 purchased from Shanghai Model Organisms Center Inc. NSG mice are immunodeficient mice  
16 established by knockout mutations in the Prkdc (encodes a protein to resolve DNA strand breaks  
17 during V(D)J recombination in developing T and B lymphocytes) and Il2rg (encodes the  
18 interleukin 2 receptor gamma chain) genes, and are the most immunodeficient instrumental mice  
19 available. NSG mice lack mature T cells, B cells, and natural killer (NK) cells. They also lack  
20 multiple cytokine signaling pathway and are deficient in innate immunity.  $2 \times 10^6$  luciferase  
21 encoding labelled HeLa cancer cells were inoculated to NSG mice subcutaneously to generate  
22 xenograft cancer model.

### 23 **Flow cytometry**

24 At indicated time point during treatment, 100  $\mu$ L peripheral blood was collected from the orbit to  
25 anticoagulant tubes from treated mice. Then, each tube was added with 1 mL of 1X erythrocyte  
26 lysate (Solarbio), followed by incubation on ice for 10 mins, and then centrifuged at 500 g for 5  
27 min. Cell pellets were collected and washed with PBS for twice. Fixable viability stain 510 (BD  
28 Biosciences) was then added to stain collected cells at room temperature for 10 mins for  
29 distinguishing live cells with dead cells. After washing with PBS, 100  $\mu$ L cell staining buffer

1 (Biolegend) was applied to suspend cells and 2  $\mu$ L Human TruStain FcX™ were added for  
2 blocking. Then, the PerCP/Cyanine5.5 anti-human CD45, and Alexa Fluor 488 anti-human CD3  
3 antibodies (all purchased from Biolegend) were added to cells and incubated at room temperature  
4 for an hour. The stained cells were analyzed by flow cytometer (Beckman). After treatment, the  
5 mouse spleen was dissected and ground. Then the single cells were collected, stained, and analyzed  
6 via the same method.

### 7 **Cytokine release *in vivo***

8 Peripheral blood was extracted from the mice's eye sockets and collected in EDTA anticoagulant  
9 tubes. The plasma was separated through centrifugation (3000 rpm, 10 mins). And the  
10 concentration of cytokines was tested by a multiplex cytokine assay kit (Cellgene Biotech).

### 11 **CAR-T cell *in vivo* proliferation study**

12  $1 \times 10^6$  luciferase-encoding CAR-T cells were injected into tumor sites directly or through ALS  
13 delivery. CAR-T cell proliferation was measured by bioluminescence imaging. At indicated time  
14 points, 100  $\mu$ L of D-Luciferin potassium salt solution (15 mg/mL) was injected into the peritoneal  
15 cavity of mice. Six minutes later, the mice were imaged using IVIS and M3Vision software was  
16 used to visualize and calculate average luminescence.

### 17 **Immunohistochemistry**

18 Tumors and other tissues were fixed in 4% paraformaldehyde, dehydrated in EtOH baths,  
19 incubated in a paraffin bath, and sectioned to 4  $\mu$ m thickness slides. After incubating in  
20 Hematoxylin and Eosin baths, the sections were observed by VS200 digital slide scanner  
21 (Olympus).

### 22 **Statistical analysis**

23 Unless otherwise stated, data are presented as means  $\pm$  s.d.. Statistical analysis was evaluated using  
24 Prism software (GraphPad). Statistical analysis was performed using one-way analysis of variance  
25 (ANOVA) followed by Tukey's post hoc tests for multiple-group analyses and unpaired student's  
26 *t*-test for two-group analyses. Results with  $P < 0.05$  are regarded as statistically significant  
27 differences. Significance is indicated by \* $P < 0.05$ , \*\* $P < 0.01$ , and \*\*\* $P < 0.001$  in the figures.

28  
29

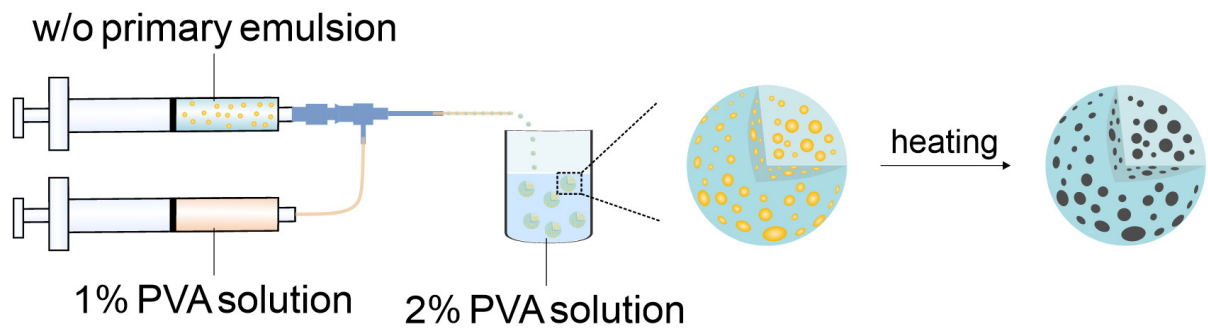

1  
2  
3  
4  
5

Figure S1. The schematic of microfluidic technology for the production of porous PLGA microspheres.



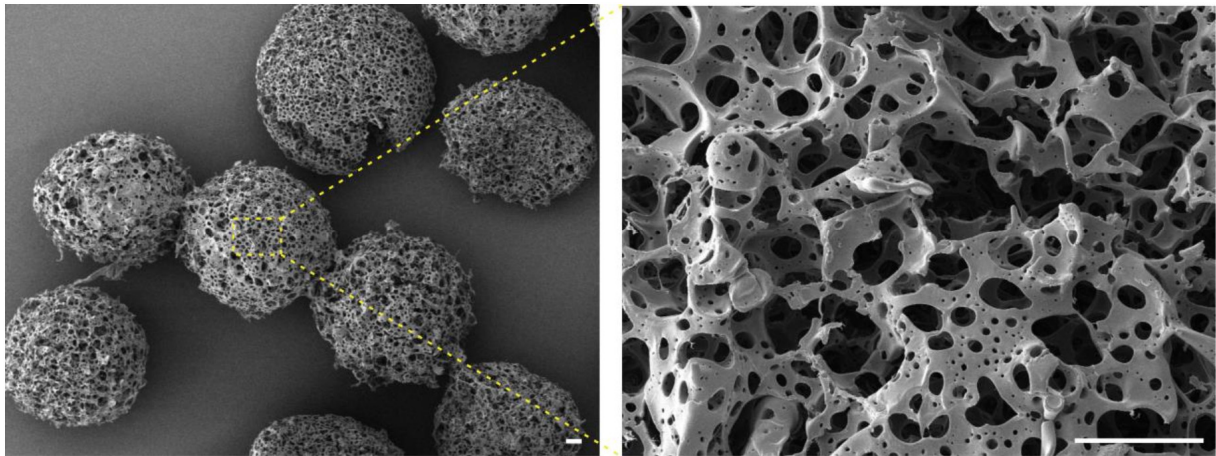

1  
2  
3  
4

Figure S2. The SEM images of alkaline hydrolysis treated microspheres. Scale bar, 50  $\mu\text{m}$ .

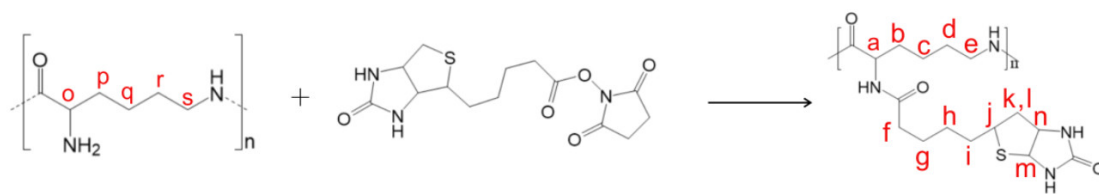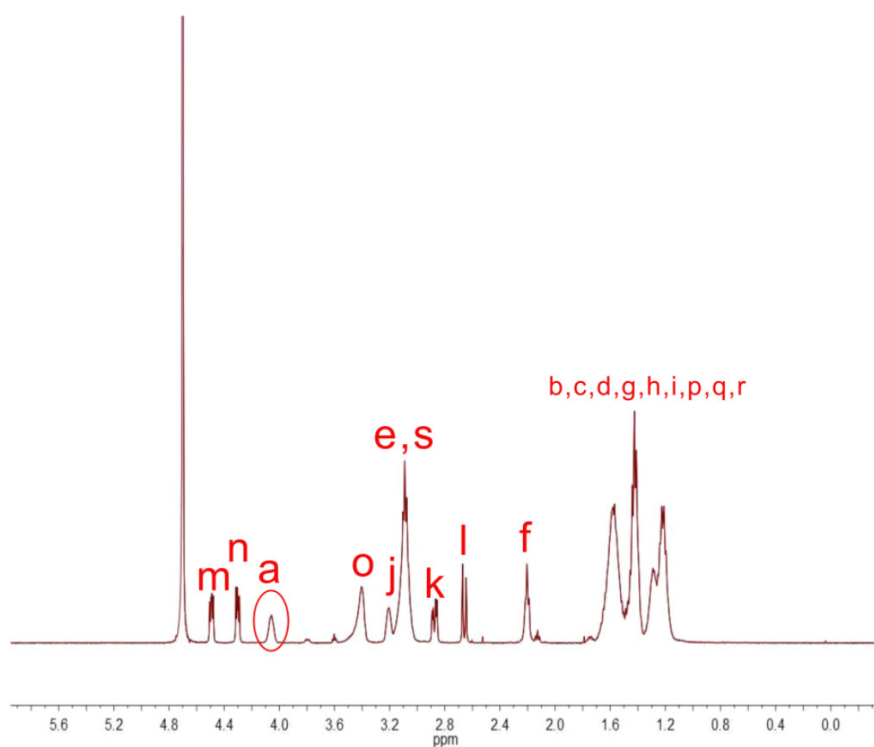

1

2 Figure S3. <sup>1</sup>H-NMR of synthesized biotin-modified poly- L -lysine (PLL-Biotin).

3

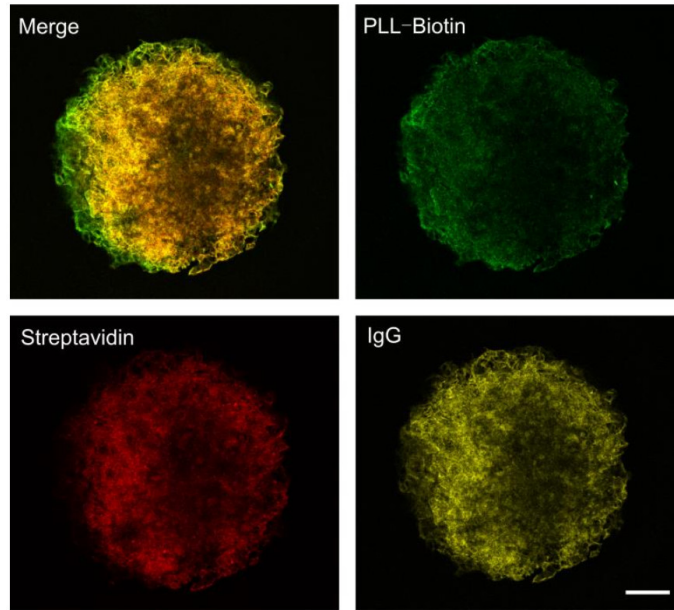

1  
2  
3  
4  
5  
6  
7

Figure S4. Confocal images of IgG-modified microspheres. PLL-Biotin, Streptavidin, and IgG were labeled with FITC, rhodamine B, and Cy5, respectively. Scale bar, 100  $\mu\text{m}$ .

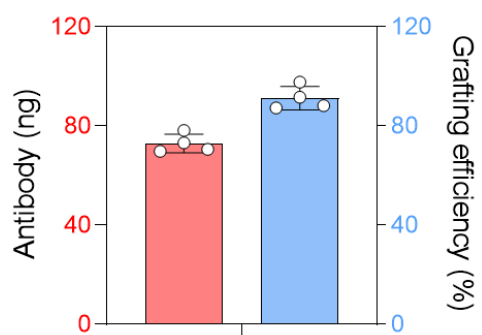

1  
2 Figure S5. The amounts of antibodies modified to per microsphere and their grafting efficiency.  $n$   
3 = 4, mean  $\pm$  s.d.  
4  
5

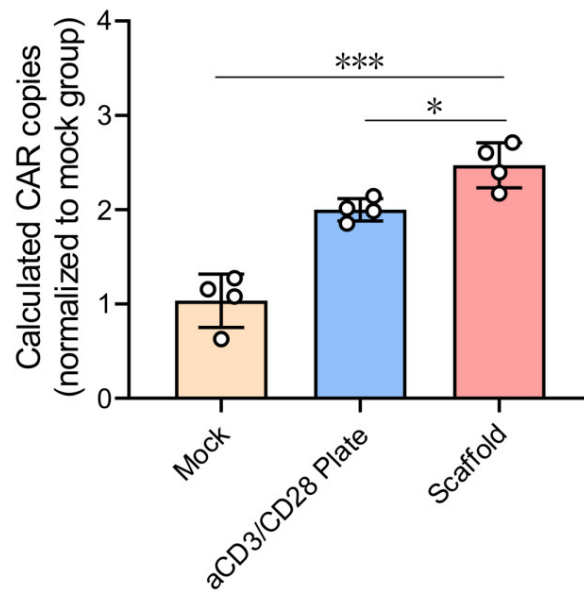

1  
2  
3  
4

Figure S6. The qPCR analysis of expanded CAR-T cells.  $n = 4$ , mean  $\pm$  s.d. Statistical analysis was performed using one-way ANOVA.  $P$  value:  $*P < 0.05$ ;  $**P < 0.01$ ;  $***P < 0.001$ .

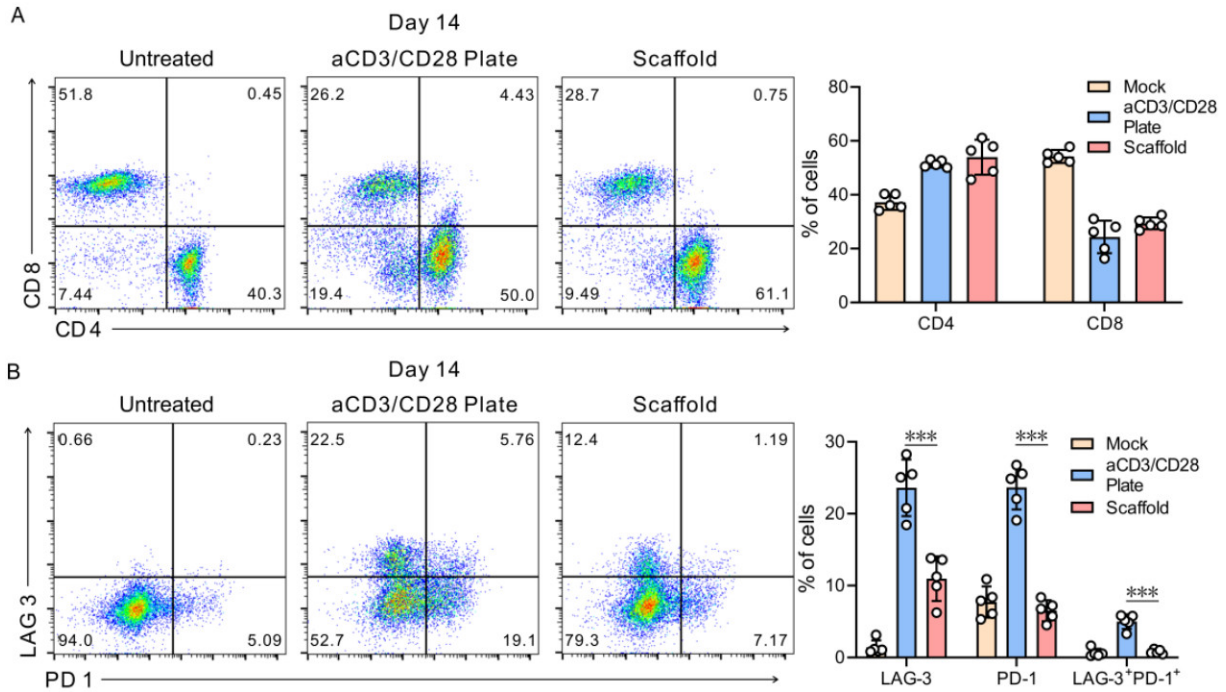

1  
2  
3  
4  
5  
6  
7  
8  
9

Figure S7. (A) Representative flow cytometric analysis images (left) and relative quantification (right) of CD8<sup>+</sup> and CD4<sup>+</sup> CAR-T cells among CD3<sup>+</sup> CAR-T cells after 14 days of activation.  $n = 5$ , mean  $\pm$  s.d. (B) Representative flow cytometric analysis images (left) and relative quantification (right) of PD-1<sup>+</sup> and LAG-3<sup>+</sup> CAR-T cells among CD3<sup>+</sup> CAR-T cells after 14 days of activation.  $n = 5$ , mean  $\pm$  s.d. Statistical analysis was performed using one-way ANOVA.  $P$  value: \* $P < 0.05$ ; \*\* $P < 0.01$ ; \*\*\* $P < 0.001$ .

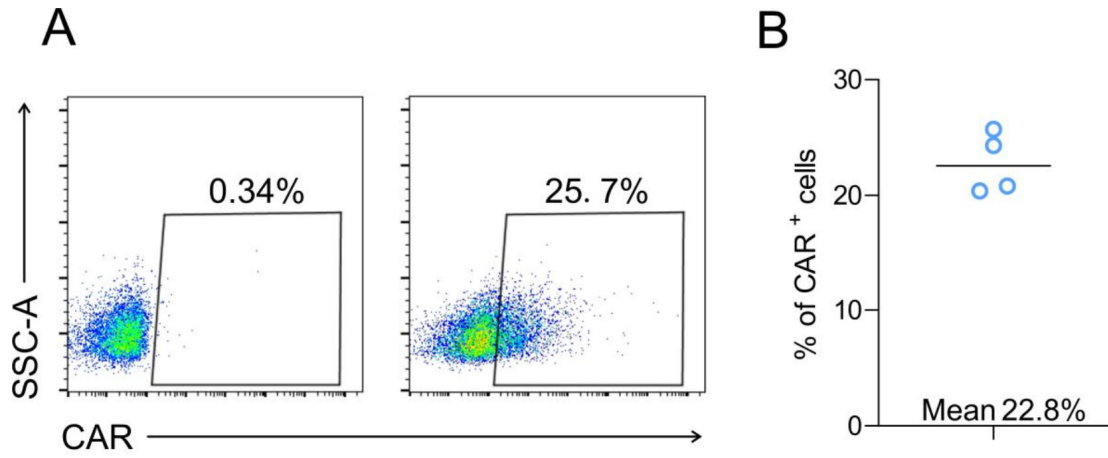

1  
2  
3  
4  
5

Figure S8. The flow cytometry analysis of CAR expression in T cells after transfection.  $n = 4$ , mean  $\pm$  s.d.

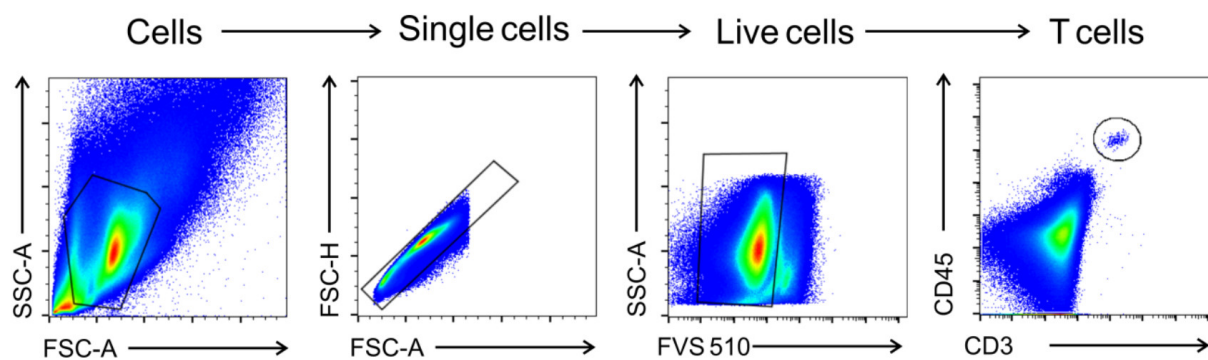

1  
2  
3  
4

Figure S9. The gating strategy of flow cytometry analysis to recognize T cells *in vivo*.



A

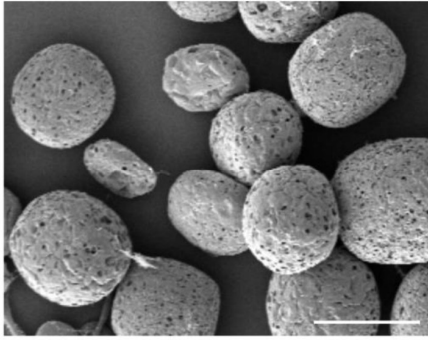

B

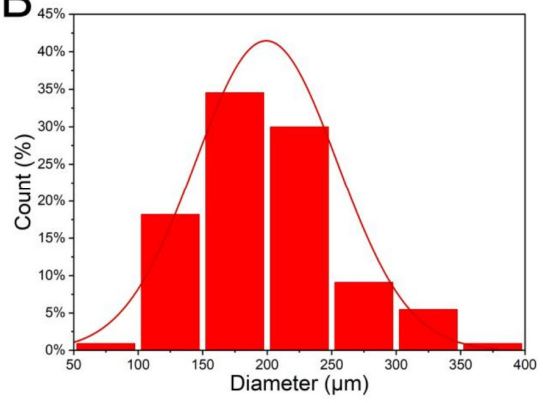

1

2 Figure S10. (A) The SEM image of IgG (as a mock of cytokines)-encapsulated microsphere. Scale

3 bar, 200 μm. (B) Distribution of diameters of the microspheres.

4

A

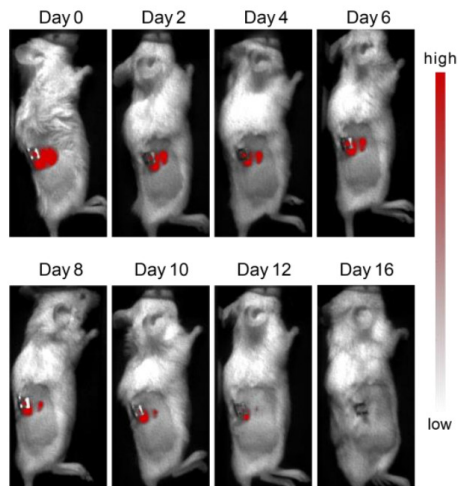

B

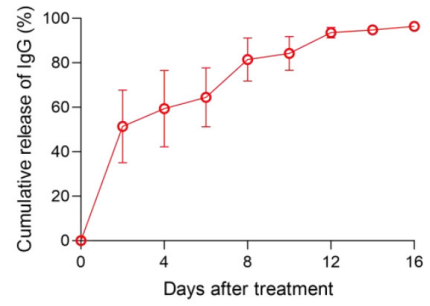

1  
2  
3  
4  
5

Figure S11. The release of Cy5 labeled IgG from microspheres. The representative fluorescent images (A) and the percentage of cumulative release of IgG (B) were analyzed.  $n = 4$ , mean  $\pm$  SEM.

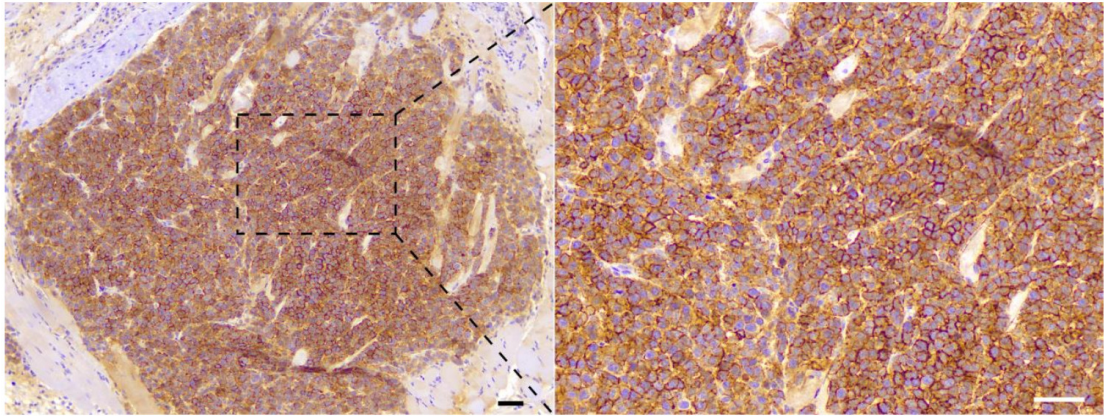

1  
2  
3  
4

Figure S12. Immunohistochemical staining of mesothelin in HeLa tumors. Scale bar, 100  $\mu\text{m}$ .

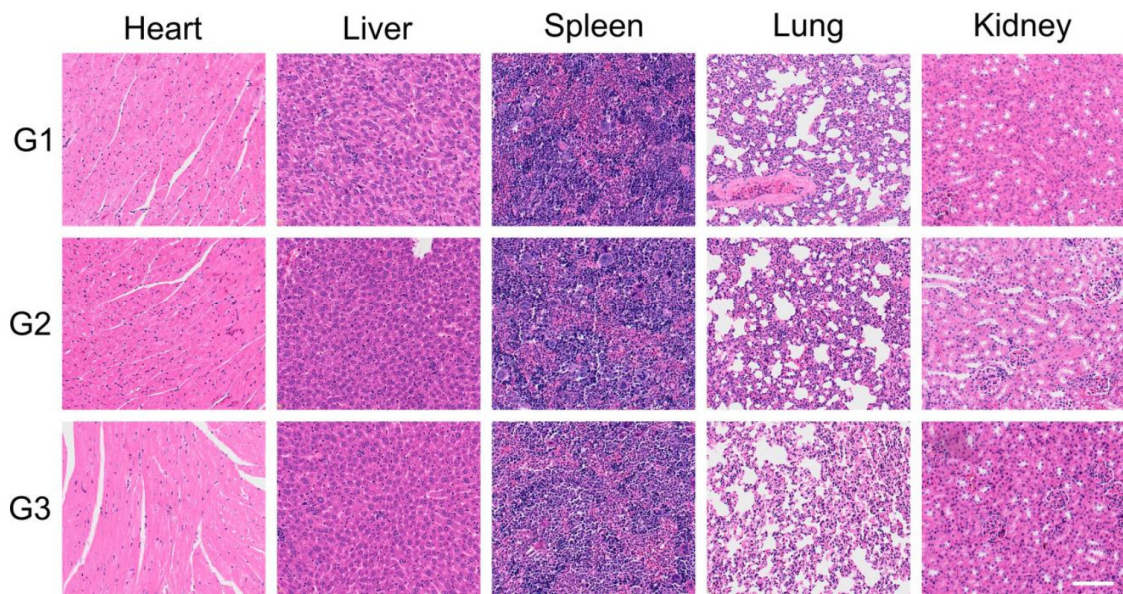

1  
2

3 Figure S13. H&E staining sections for heart, liver, spleen, lung, and kidney of mice which were  
4 untreated (G1) or treated with IT@CAR-T (G2) or ALS@CAR-T (G3). Scale bar, 100  $\mu$ m.
